# Supplementary material for: Analysis of Cardiovascular Complications During Delivery Admissions Among Patients With Systemic Lupus Erythematosus, 2004-2019
Source: PubMed Central journal article supplement (PMC9709646; doi:10.1001/jamanetworkopen.2022.43388), 2022-11-29
Supplement: jamanetwopen-e2243388-s001.pdf [file jamanetwopen-e2243388-s001.pdf]

## Supplemental Online Content

Zahid S, Mohamed MS, Wassif H, Nazir NT, Khan SS, Michos ED. Analysis of cardiovascular complications during delivery admissions among patients with systemic lupus erythematosus, 2004-2019. *JAMA Netw Open*. 2022;5(11):e2243388. doi:10.1001/jamanetworkopen.2022.43388

**eFigure 1.** Central Illustration

**eFigure 2.** Study Flow Chart

**eFigure 3.** Prevalence of Polycystic Ovary Syndrome, Gestational Diabetes, and Obesity

**eMethods 1.** Variables Used in Logistic Regression Analysis to Compute Adjusted Odds of In-Hospital Complications

**eMethods 2.** Variables Used in Logistic Regression Analysis to Compute Factors Independently Associated With Preeclampsia in Individuals With Systemic Lupus Erythematosus

**eTable 1.** Procedure and Diagnosis Codes Used

**eTable 2.** Effect Sizes of Hospitalization Characteristics Among Individuals With vs Without Systemic Lupus Erythematosus

**eTable 3.** Factors Associated With Cardiovascular Complications With vs Without Systemic Lupus Erythematosus After Adjustment for Preeclampsia and Eclampsia

**eTable 4.** Factors Associated With Cardiovascular Complications After Adjustment for Calendar Year

**eTable 5.** Factors Associated With Cardiovascular Complications Among Women Aged 35 Years or Younger

**eTable 6.** Factors Associated With Cardiovascular Complications Among Women Older Than 35 Years

**eTable 7.** Factors Associated With Cardiovascular Complications After Exclusion of Individuals With Preeclampsia or Eclampsia

**eTable 8.** Factors Associated With Cardiovascular Complications After Exclusion of Individuals With Polycystic Ovary Syndrome

**eTable 9.** Factors Associated With Cardiovascular Complications After Exclusion of Individuals With Gestational Diabetes

**eTable 10.** Factors Associated With Cardiovascular Complications After Exclusion of Individuals With Chronic Kidney Disease, Coronary Artery Disease, or Chronic Heart Failure

This supplemental material has been provided by the authors to give readers additional information about their work.

eFigure 1. Central Illustration

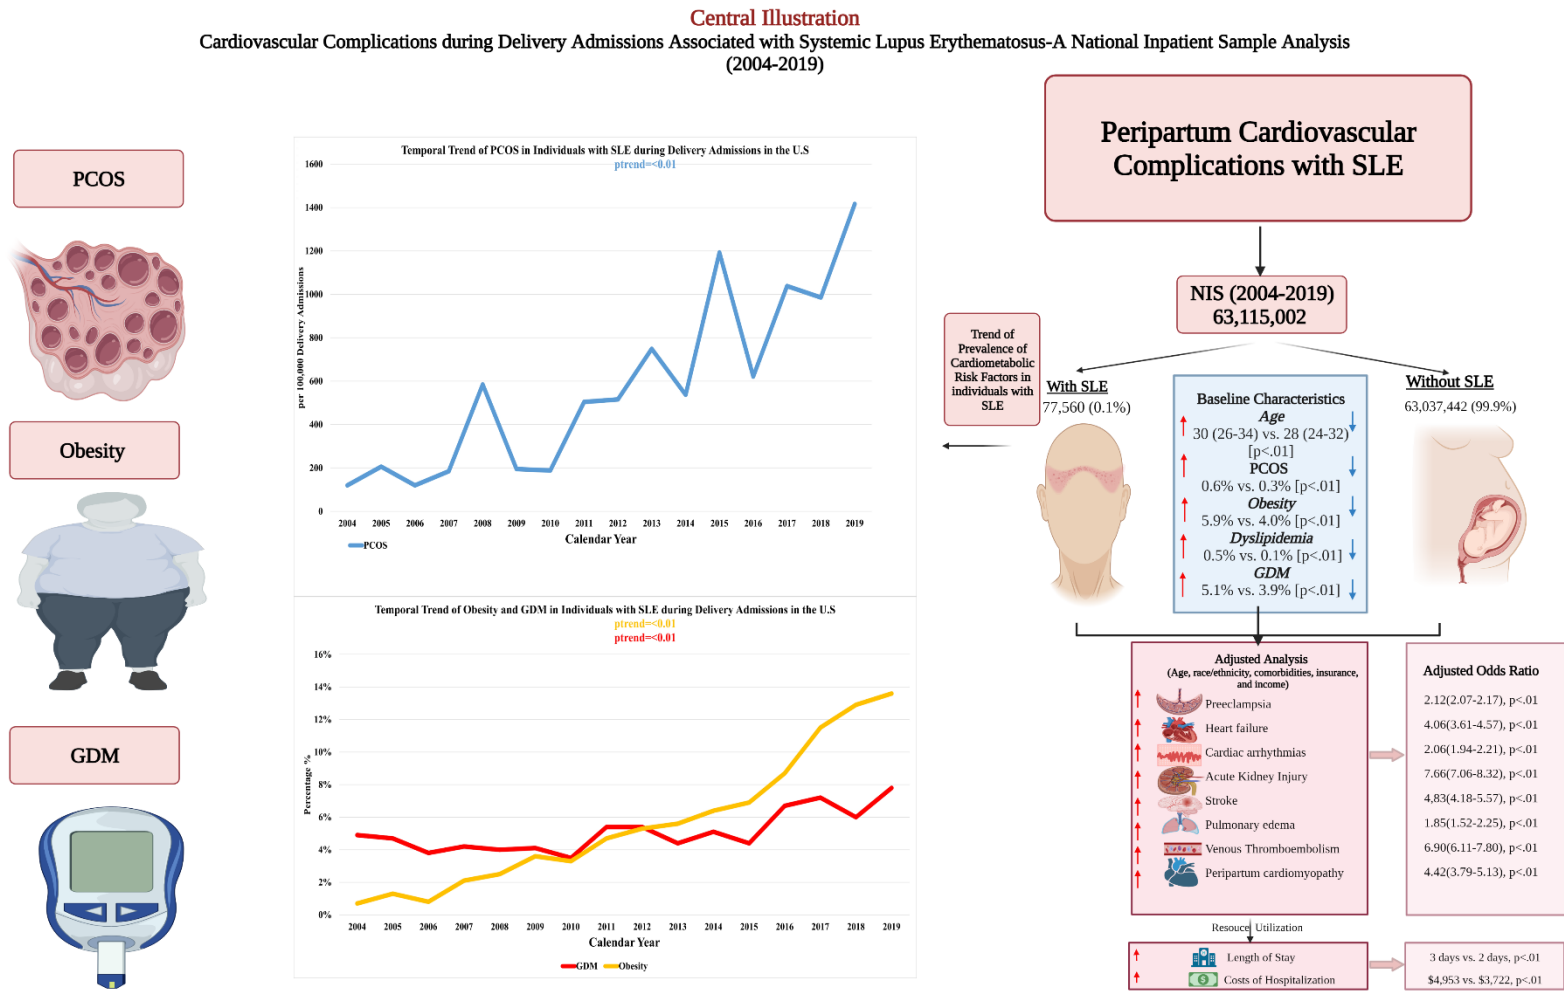

**eFigure 2. Study Flow Chart**

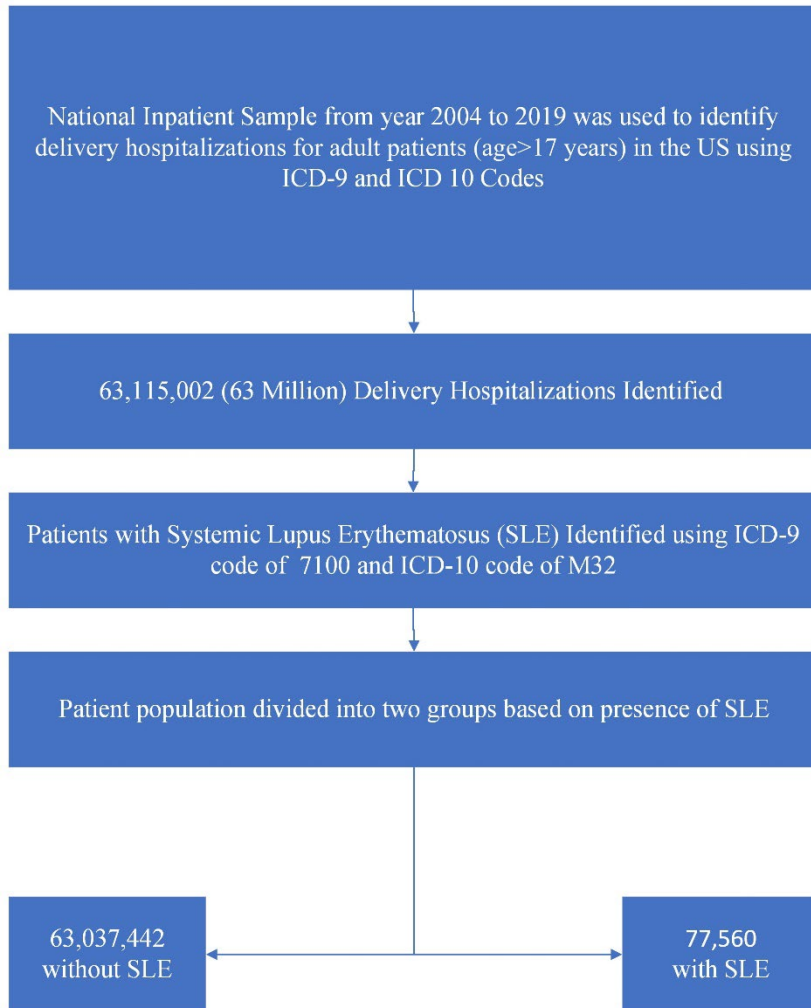

**eFigure 3.** Prevalence of Polycystic Ovary Syndrome, Gestational Diabetes, and Obesity

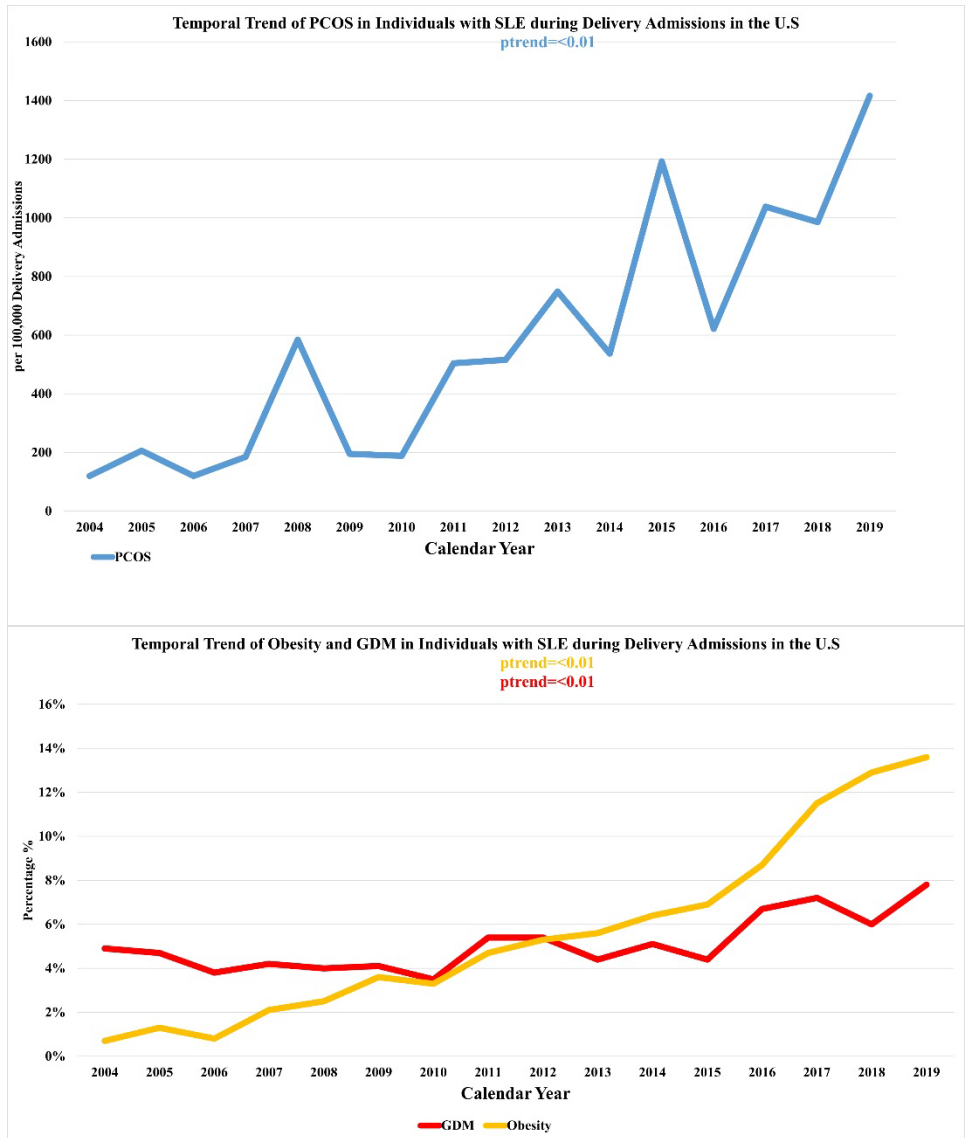

Abbreviations: US: United States, PCOS: Polycystic Ovary Syndrome, GDM: Gestational Diabetes Mellitus

**eMethods 1.** Variables Used in Logistic Regression Analysis to Compute Adjusted Odds of In-Hospital Complications

- 1- Age
- 2- Race
- 3- Chronic Hypertension
- 4- Gestational Diabetes Mellitus
- 5- Dyslipidemia
- 6- Congestive Heart Failure
- 7- Chronic Kidney Disease
- 8- Coronary Artery Disease
- 9- Obesity
- 10- PCOS
- 11- Smoking
- 12- Multiple Gestation
- 13- Cesarean Delivery
- 14- Median Household Income
- 15- Primary Insurance

**eMethods 2.** Variables Used in Logistic Regression Analysis to Compute Factors Independently Associated With Preeclampsia in Individuals With Systemic Lupus Erythematosus

- 1- Age
- 2- Race
- 3- Chronic Hypertension
- 4- Gestational diabetes mellitus
- 5- Dyslipidemias
- 6- Polycystic Ovary Syndrome
- 7- Obesity
- 8- Primary Insurance
- 9- Median Household Income

**eTable 1.** Procedure and Diagnosis Codes Used

| <b>Variables</b>                     | <b>ICD-10</b>                                                                                                                                                                                                                                                 | <b>ICD-9</b>                                                                                                                        |
|--------------------------------------|---------------------------------------------------------------------------------------------------------------------------------------------------------------------------------------------------------------------------------------------------------------|-------------------------------------------------------------------------------------------------------------------------------------|
| <b>Delivery</b>                      | 10D0, 10E0, O60, O61, O62, O63, O64, O65, O66, O67, O68, O69, O70, O71, O72, O73, O74, O75, O76, O77, O80, O82, Z37, Z38                                                                                                                                      | 72, 73,75, 650, 651, 652, 653, 654, 655, 656, 657, 658, 659, 660, 662, 663, 664, 665, 666, 667, 668, 669, V27                       |
| <b>Systemic Lupus Erythematosus</b>  | M32                                                                                                                                                                                                                                                           | 7100                                                                                                                                |
| <b>Gestational Diabetes Mellitus</b> | 648.8                                                                                                                                                                                                                                                         | 0244x                                                                                                                               |
| <b>Polycystic Ovary Syndrome</b>     | E282                                                                                                                                                                                                                                                          | 256.4                                                                                                                               |
| <b>Preeclampsia/<br/>Eclampsia</b>   | O1400, O140, O1402, O1403, O1404, O1405, O1490, O1492, O1493, O1494, O1495, O149, O141, O1410, O1412, O1413, O1414, O1415, O11, O111, O112, O113, O114, O115, O119, O142, O1420, O1422, O1423, O1424, O1425, O15, O150, O1500, O1502, O1503, O151, O152, O159 | 64241, 64242, 64243, 64244, 64250, 64251, 64252, 64253, 64254, 64270, 64271, 64272, 64273, 64274, 64260, 64261, 64262, 64263, 64264 |
| <b>Peripartum Cardiomyopathy</b>     | O903                                                                                                                                                                                                                                                          | 6745                                                                                                                                |
| <b>Heart Failure</b>                 | I5021, I5031, I5033, I5041, I5043                                                                                                                                                                                                                             | 42821, 42823, 42831, 42841, 42843                                                                                                   |
| <b>Acute Kidney Injury</b>           | N17                                                                                                                                                                                                                                                           | 584,                                                                                                                                |
| <b>Stroke</b>                        | I60, I61, I62, I63, I650, I688, O873, O2250, O2251, O2252                                                                                                                                                                                                     | 430, 431, 432, 433, 437, 6715                                                                                                       |

|                                     |                                                                                                                                                            |                                                                                                                             |
|-------------------------------------|------------------------------------------------------------------------------------------------------------------------------------------------------------|-----------------------------------------------------------------------------------------------------------------------------|
| <b>Pulmonary edema</b>              | J810, J811, I501                                                                                                                                           | 514                                                                                                                         |
| <b>Cardiac Arrhythmias</b>          | Z450, Z950, T821, R001, R008, R000, I459, I456, I441, I442, I443, I47, I48, I49                                                                            | 4260, 42613, 4267, 4269, 42610, 42612, 4270, 4271, 4272, 4273, 4274, 4276, 4277, 4278, 4279, 7850, 99601, 99604, V450, V533 |
| <b>Acute Venous Thromboembolism</b> | I82210, I82220, I82290, I824, I8241, I8242, I8243, I8244, I8245, I8246, I8249, I824Y, I824Z, I826, I8261, I8262, I82A1, I82B1, I82C1, I8281, I82890, I8290 | 4534, 45340, 45341, 45342, 4538, 45381, 45382, 45383, 45384, 45385, 45386, 45387, 45389                                     |

**ICD: International Classification of Diseases**



**eTable 2.** Effect Sizes of Hospitalization Characteristics Among Individuals With vs Without Systemic Lupus Erythematosus

| <b>Variables (continuous)*</b>            | <b>Beta coefficient (95% CI)</b> |
|-------------------------------------------|----------------------------------|
| <b><i>Resource Utilization</i></b>        |                                  |
| <b>Length of stay (days)</b>              | 1.23 (1.21-1.24)                 |
| <b>Cost of hospitalization (\$)</b>       | 2,470 (2,436-2,504)              |
| <b><i>Patient Demographics</i></b>        |                                  |
| <b>Age (years)</b>                        | 1.62 (1.58-1.66)                 |
| <b>Variables (categorical)**</b>          |                                  |
| <b>OR (95% CI)</b>                        |                                  |
| <b><i>Patient Demographics</i></b>        |                                  |
| <b>Race/Ethnicity</b>                     |                                  |
| <b>White</b>                              | 0.88 (0.86-0.89)                 |
| <b>Black</b>                              | 1.92 (1.89-1.95)                 |
| <b>Hispanic</b>                           | 0.86 (0.84-0.87)                 |
| <b>Asian or Pacific Islander</b>          | 0.98 (0.95-1.01)                 |
| <b>Native American</b>                    | 1.08 (0.99-1.17)                 |
| <b>Other</b>                              | 0.78 (0.77-0.81)                 |
| <b>Hospital Regions</b>                   |                                  |
| <b>Northeast</b>                          | 1.17 (1.15-1.19)                 |
| <b>Midwest</b>                            | 0.86 (0.85-0.88)                 |
| <b>South</b>                              | 1.04 (1.03-1.06)                 |
| <b>West</b>                               | 0.95 (0.93-0.96)                 |
| <b><i>Pre-existing co-morbidities</i></b> |                                  |
| <b>PCOS</b>                               | 1.98 (1.81-2.17)                 |
| <b>GDM</b>                                | 1.35 (1.31-1.39)                 |
| <b>Dyslipidemia</b>                       | 3.31 (3.00-3.65)                 |
| <b>Chronic Hypertension</b>               | 7.93 (7.67-8.19)                 |
| <b>Heart Failure</b>                      | 12.62 (11.64-13.69)              |
| <b>Chronic Kidney Disease</b>             | 81.61 (76.09-87.53)              |

|                                             |                     |
|---------------------------------------------|---------------------|
| <b>Coronary Artery Disease</b>              | 20.68 (17.86-23.94) |
| <b>Obesity</b>                              | 1.51 (1.46-1.55)    |
| <b>Smoking</b>                              | 1.21 (1.15-1.27)    |
| <b><i>Obstetric Characteristics</i></b>     |                     |
| <b>Multiple Gestation</b>                   | 1.40 (1.34-1.47)    |
| <b>Cesarean delivery</b>                    | 1.55 (1.52-1.57)    |
| <b>Preterm Birth</b>                        | 2.24 (2.20-2.84)    |
| <b>Still Birth</b>                          | 2.48 (2.34-2.62)    |
| <b><i>Socioeconomic Characteristics</i></b> |                     |
| <b><i>Median Household Income</i></b>       |                     |
| <b>0-25<sup>th</sup> percentile</b>         | 0.99 (0.97-1.01)    |
| <b>26-50<sup>th</sup> percentile</b>        | 0.91 (0.88-0.91)    |
| <b>51-75<sup>th</sup> percentile</b>        | 0.99 (0.97-1.01)    |
| <b>76-100<sup>th</sup> percentile</b>       | 1.14 (1.12-1.16)    |
| <b><i>Primary Insurance</i></b>             |                     |
| <b>Medicare</b>                             | 7.63 (7.38-7.88)    |
| <b>Medicaid</b>                             | 0.80 (0.79-0.81)    |
| <b>Private insurance</b>                    | 1.09 (1.08-1.11)    |
| <b>Self-Pay</b>                             | 0.49 (0.46-0.52)    |
| <b>No Charge</b>                            | 0.53 (0.41-0.67)    |
| <b>Other</b>                                | 1.15 (1.11-1.20)    |

\* Effect sizes for continuous variables of length of stay and cost of hospitalization for SLE in comparison to non-SLE group are reported as coefficients and their 95% confidence intervals. For example, for length of stay, this means that a patient with SLE will have 1.23 more admitted days than a patient without SLE. For cost, it means a patient with SLE will have \$2470 more cost compared to admitted patient without SLE. 95% confidence intervals are in the same units. \*\*Effect sizes for categorical variables are reported as odds ratios and their 95% confidence interval. The comparison group for each variable is non-SLE patients. For example SLE patients in this cohort were 22% less likely to be White compared to non-SLE patients (OR 0.88). Another example, SLE patients were 7.9-fold more likely to have chronic hypertension compared to non-SLE patients.

**eTable 3.** Factors Associated With Cardiovascular Complications With vs Without Systemic Lupus Erythematosus After Adjustment for Preeclampsia and Eclampsia

| <b>Variables</b>                 | <b>aOR</b>       | <b>p-value</b> |
|----------------------------------|------------------|----------------|
| <b>Peripartum Cardiomyopathy</b> | 1.71 (1.45-2.02) | <0.01          |
| <b>Heart Failure</b>             | 1.20 (0.99-1.45) | 0.07           |
| <b>Acute Kidney Injury</b>       | 6.76 (6.24-7.33) | <0.01          |
| <b>Stroke</b>                    | 4.06 (3.51-4.69) | <0.01          |
| <b>Pulmonary Edema</b>           | 1.31 (1.17-1.58) | <0.01          |
| <b>Cardiac Arrhythmias</b>       | 1.89 (1.78-2.02) | <0.01          |
| <b>Venous Thromboembolism</b>    | 6.35 (5.62-7.19) | <0.01          |

aOR: Adjusted Odds Ratio; SLE: Systemic Lupus Erythematosus

Adjusted for age, race/ethnicity, chronic hypertension, dyslipidemia, heart failure, chronic kidney disease, coronary artery disease, GDM, obesity, PCOS, smoking, multiple gestation, Cesarean delivery, median household income, primary insurance with additional adjustment of preeclampsia and eclampsia

**eTable 4.** Factors Associated With Cardiovascular Complications After Adjustment for Calendar Year

| <b>Variables</b>                 | <b>aOR</b>       | <b>p-value</b> |
|----------------------------------|------------------|----------------|
| <b>Preeclampsia</b>              | 1.99 (1.95-2.04) | <0.01          |
| <b>Peripartum Cardiomyopathy</b> | 1.64 (1.39-1.93) | <0.01          |
| <b>Heart Failure</b>             | 1.18 (0.97-1.43) | 0.11           |
| <b>Acute Kidney Injury</b>       | 7.27 (6.69-7.89) | <0.01          |
| <b>Stroke</b>                    | 4.69 (4.06-5.42) | <0.01          |
| <b>Pulmonary Edema</b>           | 1.54 (1.26-1.88) | <0.01          |
| <b>Cardiac Arrhythmias</b>       | 1.87 (1.75-1.99) | <0.01          |
| <b>Venous Thromboembolism</b>    | 6.38 (5.55-7.10) | <0.01          |

Adjusted for age, race/ethnicity, chronic hypertension, dyslipidemia, heart failure, chronic kidney disease, coronary artery disease, GDM, obesity, PCOS, smoking, multiple gestation, Cesarean delivery, median household income, primary insurance with additional adjustment for calendar year.

**eTable 5.** Factors Associated With Cardiovascular Complications Among Women Aged 35 Years or Younger

| <b>Variables</b>                 | <b>aOR</b>       | <b>p-value</b> |
|----------------------------------|------------------|----------------|
| <b>Preeclampsia</b>              | 2.15 (2.09-2.21) | <0.01          |
| <b>Peripartum Cardiomyopathy</b> | 1.61 (1.33-1.95) | <0.01          |
| <b>Heart Failure</b>             | 1.12 (0.89-1.41) | 0.33           |
| <b>Acute Kidney Injury</b>       | 7.87 (7.16-8.64) | <0.01          |
| <b>Stroke</b>                    | 3.95 (2.28-4.74) | <0.01          |
| <b>Pulmonary Edema</b>           | 1.36 (1.06-1.75) | 0.02           |
| <b>Cardiac Arrhythmias</b>       | 1.91 (1.78-2.06) | <0.01          |
| <b>Venous Thromboembolism</b>    | 7.89 (6.85-9.08) | <0.01          |

aOR: Adjusted Odds Ratio; SLE: Systemic Lupus Erythematosus

Adjusted for age, race/ethnicity, chronic hypertension, dyslipidemia, heart failure, chronic kidney disease, coronary artery disease, GDM, obesity, PCOS, smoking, multiple gestation, Cesarean delivery, median household income and primary insurance

**eTable 6.** Factors Associated With Cardiovascular Complications Among Women Older Than 35 Years

| <b>Variables</b>                 | <b>aOR</b>       | <b>p-value</b> |
|----------------------------------|------------------|----------------|
| <b>Preeclampsia</b>              | 1.80 (1.71-1.91) | <0.01          |
| <b>Peripartum Cardiomyopathy</b> | 1.73 (1.27-2.36) | <0.01          |
| <b>Heart Failure</b>             | 1.58 (1.02-2.46) | 0.04           |
| <b>Acute Kidney Injury</b>       | 4.97 (4.12-5.99) | <0.01          |
| <b>Stroke</b>                    | 6.41 (5.08-8.09) | <0.01          |
| <b>Pulmonary Edema</b>           | 1.96 (1.41-2.73) | <0.01          |
| <b>Cardiac Arrhythmias</b>       | 2.03 (1.77-2.33) | <0.01          |
| <b>Venous Thromboembolism</b>    | 4.18 (3.22-5.42) | <0.01          |

Adjusted for age, race/ethnicity, chronic hypertension, dyslipidemia, heart failure, chronic kidney disease, coronary artery disease, GDM, obesity, PCOS, smoking, multiple gestation, Cesarean delivery, median household income and primary insurance.

**eTable 7.** Factors Associated With Cardiovascular Complications After Exclusion of Individuals With Preeclampsia or Eclampsia

| <b>Variables</b>                 | <b>aOR</b>       | <b>p-value</b> |
|----------------------------------|------------------|----------------|
| <b>Peripartum Cardiomyopathy</b> | 1.33 (1.08-1.63) | 0.01           |
| <b>Heart Failure</b>             | 1.29 (1.03-1.62) | 0.02           |
| <b>Acute Kidney Injury</b>       | 7.98 (7.12-8.95) | <0.01          |
| <b>Stroke</b>                    | 4.11 (3.39-4.99) | <0.01          |
| <b>Pulmonary Edema</b>           | 2.22 (1.69-2.91) | <0.01          |
| <b>Cardiac Arrhythmias</b>       | 1.95 (1.81-2.09) | <0.01          |
| <b>Venous Thromboembolism</b>    | 6.03 (5.23-6.95) | <0.01          |

Adjusted for age, race/ethnicity, chronic hypertension, dyslipidemia, heart failure, chronic kidney disease, coronary artery disease, GDM, obesity, PCOS, smoking, multiple gestation, Cesarean delivery, median household income and primary insurance.

**eTable 8.** Factors Associated With Cardiovascular Complications After Exclusion of Individuals With Polycystic Ovary Syndrome

| <b>Variables</b>                 | <b>aOR</b>       | <b>p-value</b> |
|----------------------------------|------------------|----------------|
| <b>Preeclampsia</b>              | 2.08 (2.03-2.13) | <0.01          |
| <b>Peripartum Cardiomyopathy</b> | 2.08 (2.03-2.13) | <0.01          |
| <b>Heart Failure</b>             | 1.17 (0.96-1.43) | 0.11           |
| <b>Acute Kidney Injury</b>       | 7.47 (6.88-8.11) | <0.01          |
| <b>Stroke</b>                    | 4.67 (4.04-5.40) | <0.01          |
| <b>Pulmonary Edema</b>           | 1.56 (1.28-1.91) | <0.01          |
| <b>Cardiac Arrhythmias</b>       | 1.97 (1.85-2.10) | <0.01          |
| <b>Venous Thromboembolism</b>    | 6.58 (5.81-7.45) | <0.01          |

Adjusted for age, race/ethnicity, chronic hypertension, dyslipidemia, heart failure, chronic kidney disease, coronary artery disease, GDM, obesity, smoking, multiple gestation, Cesarean delivery, median household income and primary insurance.



**eTable 9.** Factors Associated With Cardiovascular Complications After Exclusion of Individuals With Gestational Diabetes

| <b>Variables</b>                 | <b>aOR</b>       | <b>p-value</b> |
|----------------------------------|------------------|----------------|
| <b>Preeclampsia</b>              | 2.15 (2.10-2.21) | <0.01          |
| <b>Peripartum Cardiomyopathy</b> | 1.52 (1.29-1.81) | <0.01          |
| <b>Heart Failure</b>             | 1.15 (0.94-1.40) | 0.17           |
| <b>Acute Kidney Injury</b>       | 7.38 (6.77-8.04) | <0.01          |
| <b>Stroke</b>                    | 4.46 (3.84-5.19) | <0.01          |
| <b>Pulmonary Edema</b>           | 1.47 (1.19-1.81) | <0.01          |
| <b>Cardiac Arrhythmias</b>       | 1.97 (1.84-2.11) | <0.01          |
| <b>Venous Thromboembolism</b>    | 6.83 (6.03-7.75) | <0.01          |

Adjusted for age, race/ethnicity, chronic hypertension, dyslipidemia, heart failure, chronic kidney disease, coronary artery disease, obesity, PCOS, smoking, multiple gestation, Cesarean delivery, median household income and primary insurance.

**eTable 10.** Factors Associated With Cardiovascular Complications After Exclusion of Individuals With Chronic Kidney Disease, Coronary Artery Disease, or Chronic Heart Failure

| <b>Variables</b>                 | <b>aOR</b>       | <b>p-value</b> |
|----------------------------------|------------------|----------------|
| <b>Preeclampsia</b>              | 2.08 (2.03-2.13) | <0.01          |
| <b>Peripartum Cardiomyopathy</b> | 1.82 (1.54-2.14) | <0.01          |
| <b>Heart Failure</b>             | 1.17 (0.96-1.43) | 0.12           |
| <b>Acute Kidney Injury</b>       | 7.60 (7.00-8.25) | <0.01          |
| <b>Stroke</b>                    | 4.75 (4.12-5.49) | <0.01          |
| <b>Pulmonary Edema</b>           | 1.66 (1.37-2.02) | <0.01          |
| <b>Cardiac Arrhythmias</b>       | 1.98 (1.85-2.11) | <0.01          |
| <b>Venous Thromboembolism</b>    | 6.72 (5.95-7.81) | <0.01          |

Adjusted for age, race/ethnicity, chronic hypertension, dyslipidemia, GDM, obesity, PCOS, smoking, multiple gestation, Cesarean delivery, median household income and primary insurance.
